# Supplementary material for: Chemometric-Assisted Litmus Test: One Single Sensing Platform Adapted from 1–13 to Narrow pH Ranges
Source: MDPI journal article supplement (doi:10.3390/s23031696), 2023-02-03
Supplement: s1 [file s1]

# Chemometric-Assisted Litmus Test: One Single Sensing Platform Adapted from 1–13 to Narrow pH Ranges

Lisa Rita Magnaghi, Giancarla Alberti, Camilla Zanoni, Marta Guembe-Garcia, Paolo Quadrelli and Raffaella Biesuz

## SUPPLEMENTARY MATERIALS

### 1 CHEMOMETRIC-ASSISTED PH MEASUREMENTS FROM 1 TO 13

#### 1.1 PCA model

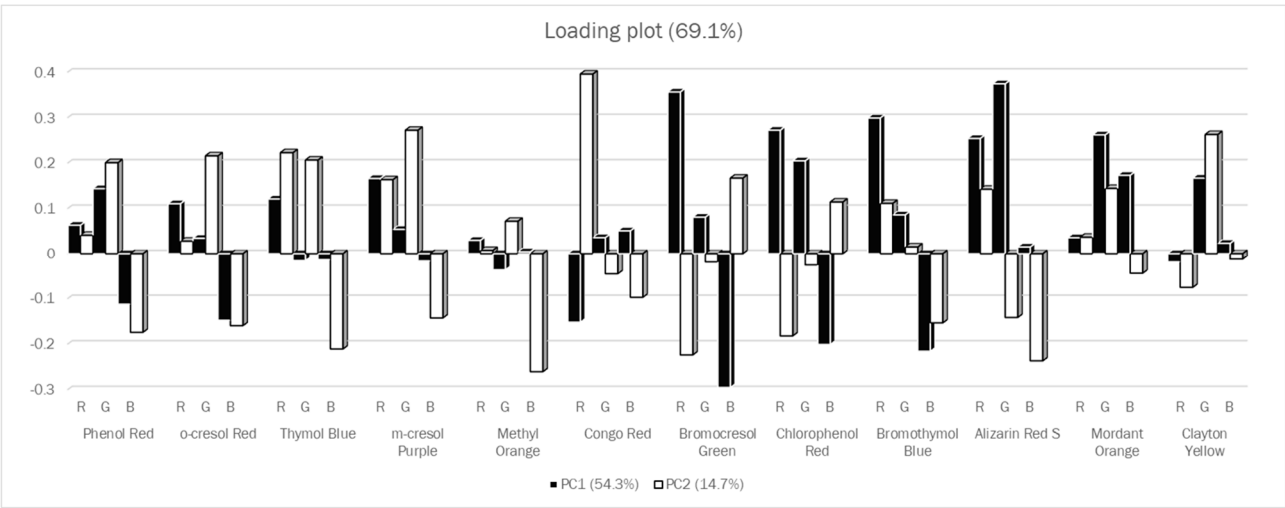

Figure S1: Loading values on PC1 and PC2 for PCA model built on training samples listed in Table 4 for pH measurements from 1 to 13

#### 1.2 PLS model

Table S1: Main statistics for PLS model built on development samples and validated by prediction of validation samples. The two submatrices are obtained by splitting the training samples dataset with a ratio 3:1, using one replicate for each pH value as validation set

|                                |        |
|--------------------------------|--------|
| <i>n° components</i>           | 3      |
| <i>n° development samples</i>  | 39     |
| <i>% Explained variance CV</i> | 97.48% |
| <i>RMSECV</i>                  | 0.5798 |
| <i>n° validation samples</i>   | 13     |
| <i>RMSEP</i>                   | 0.5511 |

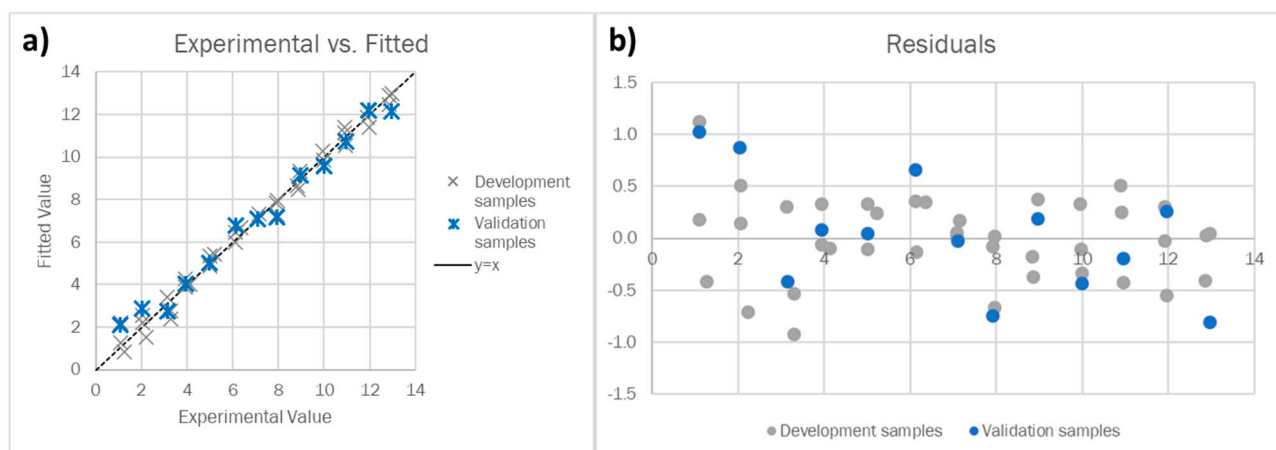

Figure S2: Experimental vs. Fitted plot for development (grey) and validation samples (blue) (a) and residuals for training (grey) and robustness samples (blue)

## 2 CHEMOMETRIC-ASSISTED SENSORS SELECTION FOR PH MEASUREMENTS IN SPECIFIC RANGES

### 2.1 PCA models

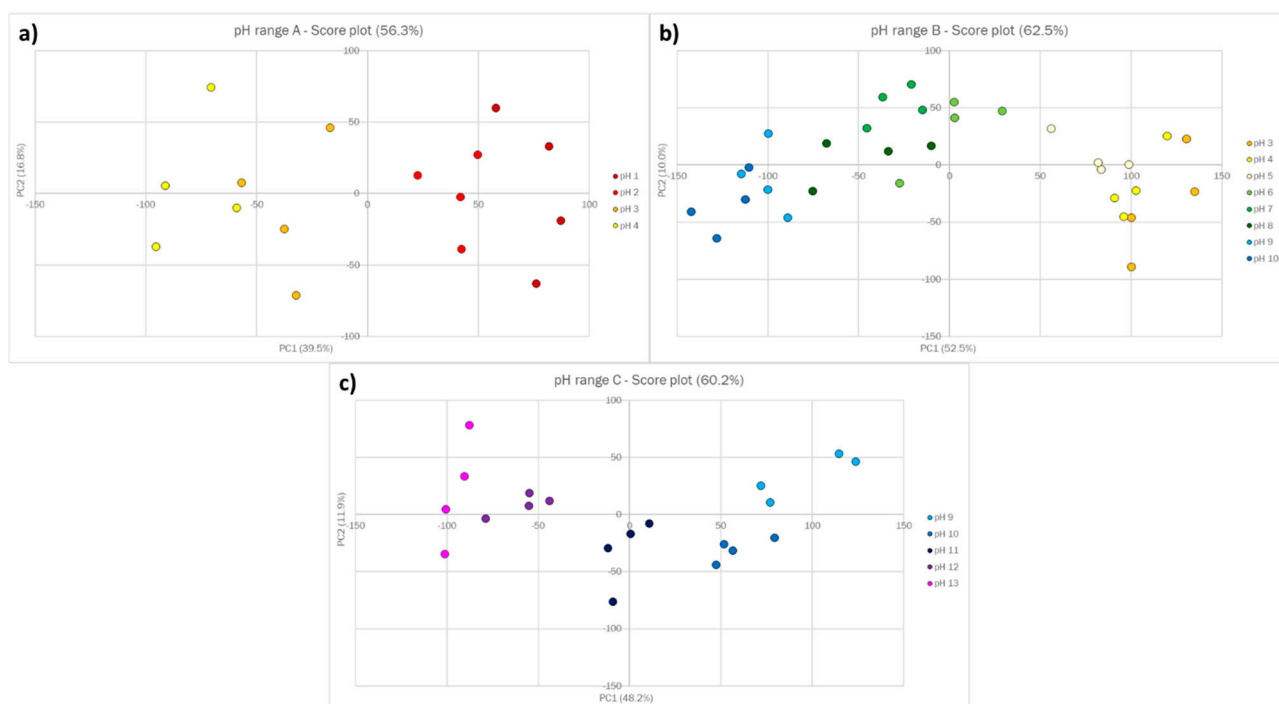

Figure S3: The score plot on the first two components for the PCA models built on the corresponding training samples listed in Table 4 for pH range A (a), B (b) and C (c).

## 2.2 PLS models

Table S2: Main statistics for PLS models built on development samples and validated by prediction of validation samples. The two submatrices are obtained by splitting the training samples dataset with a ratio 3:1, using one replicate for each pH value as validation set

|                                | pH range A | pH range B | pH range C |
|--------------------------------|------------|------------|------------|
| <i>pH range</i>                | 1-4        | 3-10       | 9-13       |
| <i>n° components</i>           | 2          | 2          | 2          |
| <i>n° development samples</i>  | 12         | 24         | 15         |
| <i>% Explained variance CV</i> | 92.30%     | 95.06%     | 92.28%     |
| <i>RMSECV</i>                  | 0.3021     | 0.4919     | 0.3923     |
| <i>n° validation samples</i>   | 4          | 8          | c, f       |
| <i>RMSEP</i>                   | 0.2923     | 0.5527     | 0.3089     |

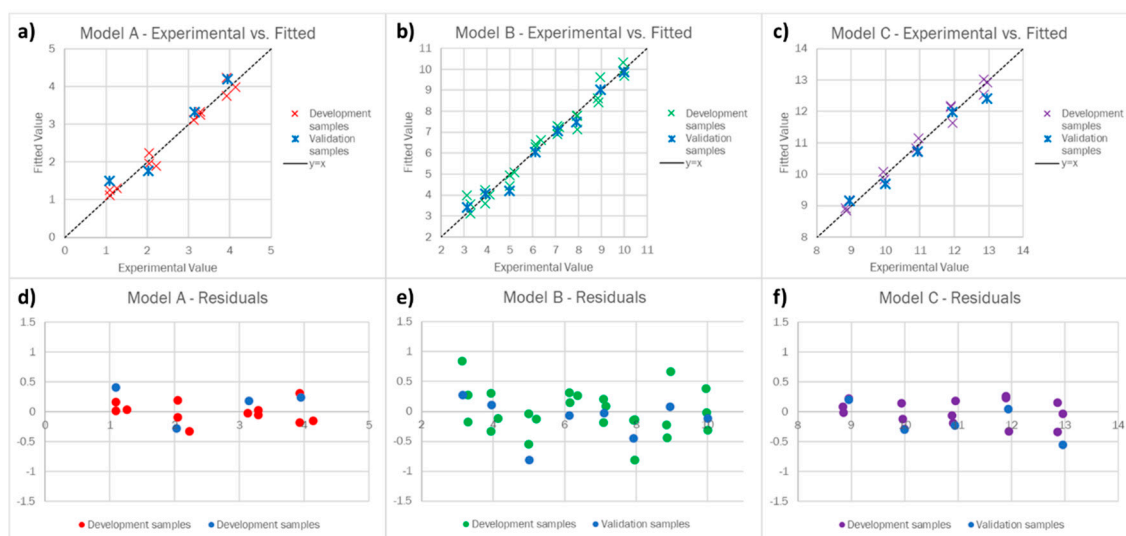

Figure S4: Experimental vs. Fitted plot for development (red for Model A, green for Model B, violet for Model C) and validation samples (blue) for Model A (a), Model B (b) and Model C (c) and residuals for development (red for Model A, green for Model B, violet for Model C) and validation samples (blue) for Model A (d), Model B (e) and Model C (f)

## 3 EVALUATION OF DYE RELEASE FROM DYE-EVOH@ SENSORS

Table S3: Dye concentrations ( $\mu\text{M}$ ) and dye release ( $\mu\text{mol/g}$ ) in solutions for 3-EVOH@ and 7-EVOH@ during 10-days release experiments

|               | Dye concentration ( $\mu\text{M}$ ) |         | Dye release ( $\mu\text{mol/g}$ ) |         |
|---------------|-------------------------------------|---------|-----------------------------------|---------|
|               | 3-EVOH@                             | 7-EVOH@ | 3-EVOH@                           | 7-EVOH@ |
| <i>Day 2</i>  | 3.2                                 | 1.6     | 0.79                              | 0.39    |
| <i>Day 5</i>  | 4.0                                 | 2.7     | 1.01                              | 0.67    |
| <i>Day 8</i>  | 4.3                                 | 2.9     | 1.08                              | 0.73    |
| <i>Day 10</i> | 4.2                                 | 3.3     | 1.04                              | 0.83    |
